# Supplementary material
Source: Springer Nature journal article supplement (https://www.springermedizin.de/resource/supplementary/12939_2013_412_MOESM11_ESM.pdf/9551118)

**Hospital Beds per Capita (OD)**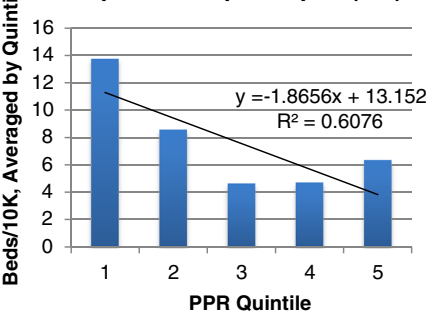**NHMF Beds per Capita (OD)**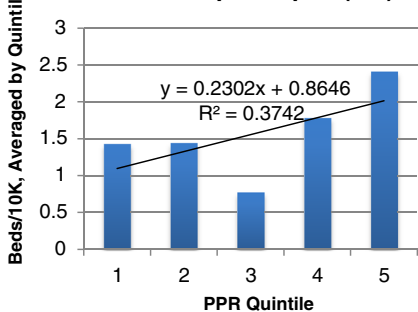**Hospital-based Doctors per Capita (OD)**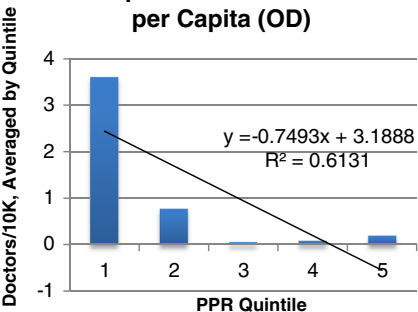**NHMF-based Doctors per Capita (OD)**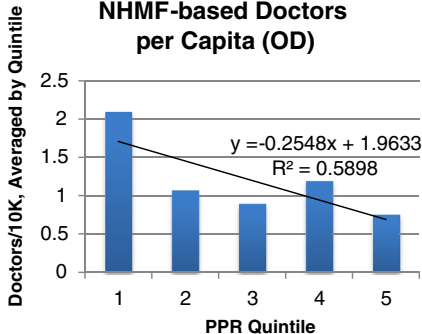**Hospital-based Nurses per Capita (OD)**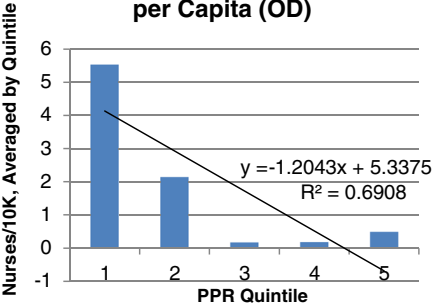**NHMF-based Nurses per Capita (OD)**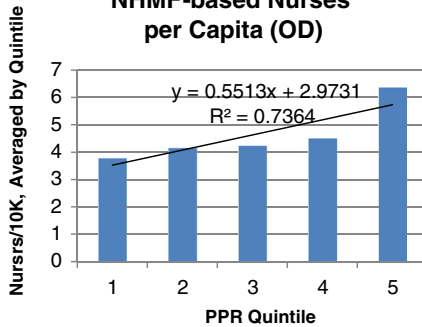

Supplement: MOESM11 [file 9551118]
